# Supplementary material for: Efficient interface and bulk passivation of PbS quantum dot infrared photodetectors by PbI2incorporation
Source: Royal Society of Chemistry journal article supplement (doi:10.1039/c7ra10422g), 2017-01-01
Supplement: c7ra10422g1.pdf [file c7ra10422g1.pdf]

**Supporting information Materials:**

**Efficient interface and bulk passivation to PbS quantum dots  
infrared photodetectors by PbI<sub>2</sub> incorporation**

Keke Qiao,<sup>1</sup> Yulin Cao,<sup>2\*</sup> Xiaokun Yang,<sup>1</sup> Jahangir Khan,<sup>1</sup> Hui Deng,<sup>1</sup> Jian Zhang,<sup>1</sup>  
Umar Farooq,<sup>1</sup> Shengjie Yuan,<sup>1</sup> Haisheng Song<sup>1\*</sup>

<sup>1</sup>*Wuhan National Laboratory for Optoelectronics (WNLO), Huazhong University of Science and Technology (HUST), 1037 Luoyu Road, Wuhan, Hubei, 430074, China.*

<sup>2</sup>*Physics Laboratory, Industrial Training Center, Shenzhen Polytechnic, Shenzhen, People's Republic of China.*

*\*Corresponding author emails: [caoyulin@szpt.edu.cn](mailto:caoyulin@szpt.edu.cn) (Y.L.C) and [songhs-wnlo@mail.hust.edu.cn](mailto:songhs-wnlo@mail.hust.edu.cn) (S.H.S).*

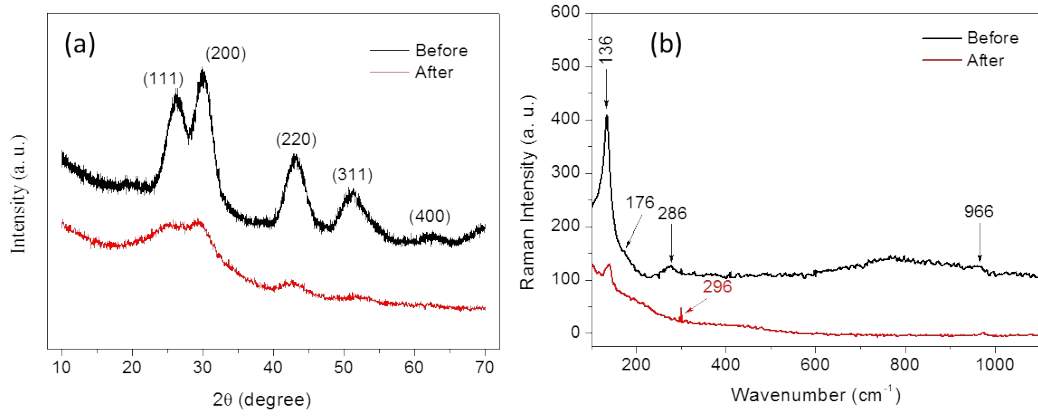

Figure s1. (a) XRD of PbS QDs before and after ligand exchange; (b) Raman of PbS QDs before and after PbI<sub>2</sub> treatment.

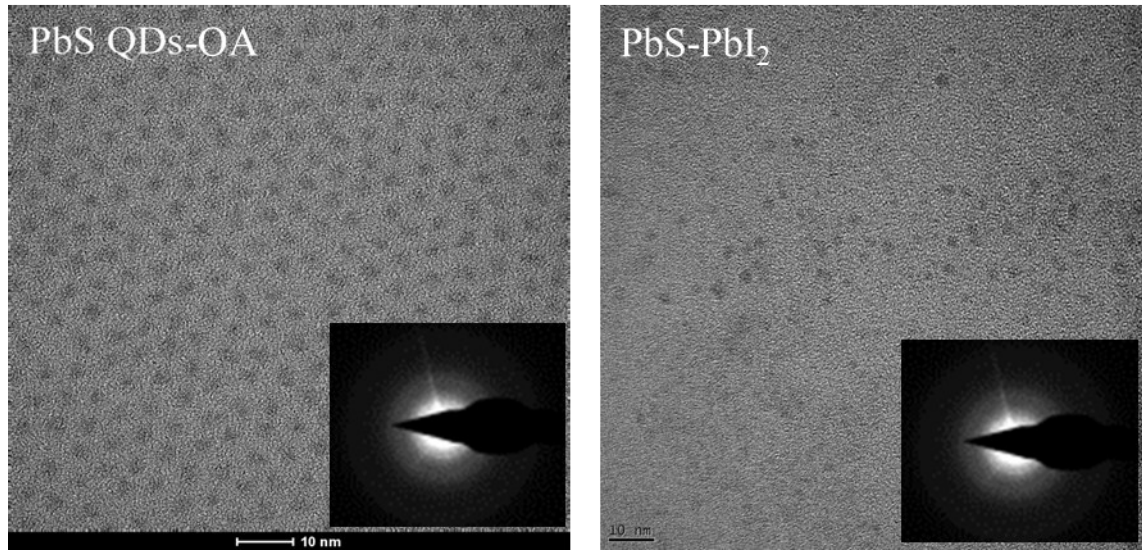

Figure s2. TEM and SAEM of QDs before (a) and after (b) PbI<sub>2</sub> treatment.

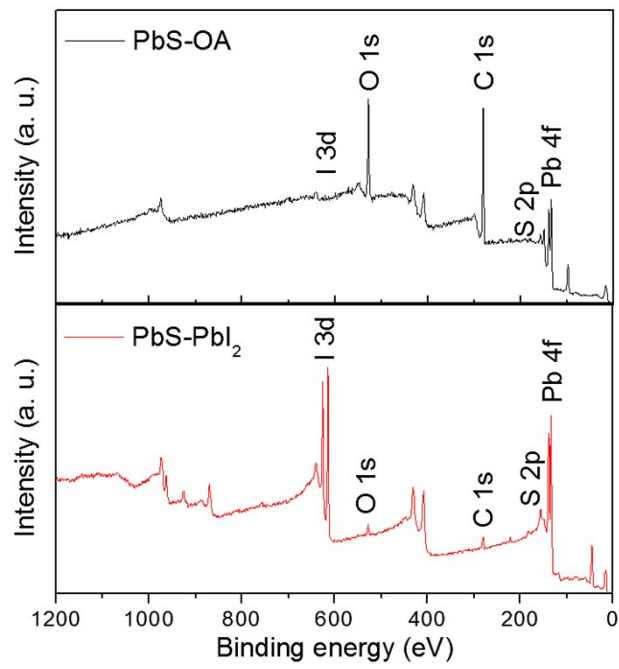

Figure s3. XPS of PbS QDs before and after PbI<sub>2</sub> treatment.

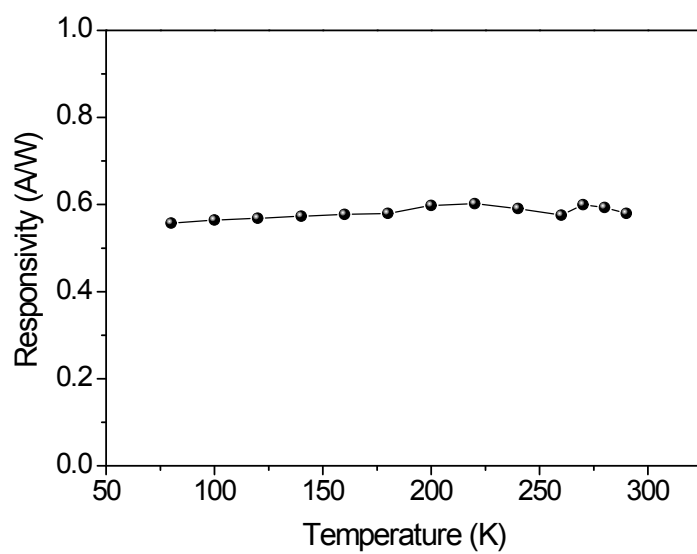

Figure s4. Temperature dependent responsivity of PbI<sub>2</sub> treated PbS QDs.
